# Supplementary material
Source: publisher figshare collection journal article supplement (https://gsapubs.figshare.com/articles/dataset/_/23902203)
Supplement: Supplementary file 1 [file 1]

## Sheet: Sheet1
Supplement table S1
Mineral	bulk	bulk input	grt	grt	grt	grt	grt	grt	grt	grt	grt	Grt	am	am	am	am	wm	wm	wm	bt	bt	bt	pl	pl	chl	chl	czo
			(p, core)	(p, core)	(p, core)	(p, rim)	(p, rim)	(p, vein)	(r, core)	(r, core)	(r, rim)	(r,ret)
SiO2	61.19	-	38.03	37.47	38.13	37.96	37.8	37.1	37.94	37.85	37.9	37.95	39.955	39.98	40.193	39.97	48.46	48.01	49.96	35.27	35.08	35.19	59.21	59.21	23.73	24.44	37.66
TiO2	0.41	-	0.14	0.07	0.13	0.11	0.02	0.15	0.37	0.18	0.08	0.09	0.466	0.21	0.495	0.22	0.27	0.23	0.23	1.86	1.87	2.02	0.02	bd	0.05	0.08	0.07
Al2O3	13.72	-	21.42	21.79	21.27	21.25	21.3	21.89	20.87	21.08	21.11	21.09	19.848	20.3	19.848	19.97	33.66	34	33.11	17.92	18.01	18.05	26.22	25.64	22.7	21.72	27.42
FeO/	13.15	-	32.82	32.65	32.43	35.14	36.01	30.09	30.23	30.38	35.21	34.02	21.567	21.69	20.784	21.31	2.1	2.05	1.93	24.34	24.25	24.51	0.63	0.28	31.89	31.12	6.94
Fe2O3*
MnO	0.29	-	1.11	1.22	0.73	0.49	0.12	2.3	3.08	2.52	0.74	1.72	0.067	0.08	0.091	0.11	0.03	0.01	0.02	0.04	0.04	0.01	bd	bd	0.12	0.09	0.06
MgO	2.1	-	0.85	0.8	0.83	1.33	1.64	0.63	1	0.69	1.15	0.9	3.045	3.09	3.464	3.17	1.1	0.99	0.79	6.58	6.47	6.55	bd	bd	9.74	10.42	0.02
CaO	3.98	-	6.56	6.74	7.1	4.4	3.98	7.43	6.75	7.24	4.24	4.87	11.405	11.31	11.472	11.43	0	bd	0.05	0.02	0.01	0.01	7.5	7.62	0.08	0.27	23.87
Na2O	0.89	-	0	0.04	0.01	0.04	0.05	0.03	0.02	bd	0.07	0.06	1.238	1.33	1.221	1.09	0.32	0.38	0.5	0.11	0.07	0.04	7.03	7.09	0.05	0.05	bd
K2O	2.05	-	0.01	bd	0.01	bd	0.01	0.01	0.01	0.01	0.02	0.02	0.839	0.66	0.59	0.67	10.83	10.9	10.45	9.61	9.83	9.53	0.09	0.08	0.06	0.05	bd
Cr2O3	0.01	-	bd	0.02	0.02	0.04	bd	bd	0.04	0.06	0.03	0	0.029	bd	0.056	0.05	bd	0.01	bd	0.04	0.04	0.05	bd	bd	0.05	0.03	0
Total	99.47	-	100.94	100.79	100.65	100.72	100.9	99.64	100.3	100.01	100.54	100.72	97.59	97.99	97.57	97.27	96.76	96.55	97.05	95.77	95.64	95.97	100.69	99.91	88.42	88.25	96.04
P2O5	0.07	-
SO3	0.12	-
LOI	1.49	-
Si	61.47	61.81	6.05	5.98	6.07	6.06	6.04	5.97	6.07	6.07	6.08	6.08	6.03	6.02	6.05	6.05	6.37	6.32	6.51	5.48	5.47	5.46	2.63	2.65	2.57	2.64	2.99
Ti	0.31	-	0.02	0.01	0.02	0.01	0	0.02	0.04	0.02	0.01	0.01	0.05	0.02	0.06	0.03	0.03	0.02	0.02	0.22	0.22	0.24	0	bd	0	0.01	0
Al	16.25	16.34	4.02	4.1	3.99	4	4.01	4.15	3.94	3.99	3.99	3.98	3.53	3.6	3.52	3.56	5.21	5.28	5.09	3.28	3.31	3.3	1.37	1.35	2.9	2.77	2.57
Fe	9.94	10	4.37	4.36	4.32	4.69	4.81	4.05	4.04	4.07	4.72	4.56	2.72	2.73	2.62	2.7	0.23	0.23	0.21	3.17	3.16	3.18	0.02	0.01	2.89	2.81	0.41
Mn	0.25	-	0.15	0.17	0.1	0.07	0.02	0.31	0.42	0.34	0.1	0.23	0.01	0.01	0.01	0.01	0	0	0	0.01	0	0	bd	bd	0.01	0.01	0
Mg	3.14	3.16	0.2	0.19	0.2	0.32	0.39	0.15	0.24	0.17	0.27	0.21	0.69	0.69	0.78	0.71	0.22	0.19	0.15	1.52	1.5	1.51	bd	bd	1.57	1.68	0
Ca	4.28	4.31	1.12	1.15	1.21	0.75	0.68	1.28	1.16	1.24	0.73	0.84	1.84	1.82	1.85	1.85	0	bd	0.01	0	0	0	0.36	0.36	0.01	0.03	2.03
Na	1.73	1.74	0	0.01	0	0.01	0.01	0.01	0.01	bd	0.02	0.02	0.36	0.39	0.36	0.32	0.08	0.1	0.13	0.03	0.02	0.01	0.61	0.61	0.01	0.01	bd
K	2.63	2.64	0	bd	0	bd	0	0	0	0	0	0	0.16	0.13	0.11	0.13	1.82	1.83	1.74	1.91	1.95	1.89	0	0	0.01	0.01	bd
Cr	0.01	-	bd	0	0	0	bd	0	0.01	0.01	0	0	0	bd	0.01	0.01	bd	0	bd	0	0	0.01	bd	bd	0	0	0
SUM	100	100	15.92	15.96	15.91	15.92	15.96	15.94	15.91	15.91	15.93	15.93	15.4	15.41	15.36	15.36	13.95	13.98	13.85	15.62	15.64	15.6	4.99	4.99	9.98	9.97	8.01
O	167.73	167.79	24	24	24	24	24	24	24	24	24	24	23	23	23	23	22	22	22	22	22	22	8	8	14	14	12.5
Fe/	0.76	0.76	0.96	0.96	0.96	0.94	0.93	0.96	0.94	0.96	0.94	0.96	0.8	0.8	0.77	0.79	0.52	0.54	0.58	0.67	0.68	0.68	1	1	0.65	0.63	0.99
(Fe+Mg)
